# Supplementary material for: Room temperature phosphorescence from a guest molecule confined in the restrictive space of an organic-inorganic supramolecular assembly
Source: Royal Society of Chemistry journal article supplement (doi:10.1039/c6pp00124f), 2016-06-30
Supplement: c6pp00124f1.pdf [file c6pp00124f1.pdf]

**Supporting Information for**

**Room Temperature Phosphorescence from a Guest Molecule  
Confined in Restrictive Space of an Organic–Inorganic  
Supramolecular Assembly**

Yohei Ishida<sup>a</sup>, Tetsuya Shimada<sup>b,c</sup>, Elamparuthi Ramasamy<sup>d</sup>, Vaidhyanathan

Ramamurthy<sup>d,\*</sup> and Shinsuke Takagi<sup>b,c,\*</sup>

<sup>a</sup> Division of Material Science and Engineering, Faculty of Engineering, Hokkaido University, Kita 13, Nishi 8, Kita-ku, Sapporo, Hokkaido 060-8628, Japan.

<sup>b</sup> Department of Applied Chemistry, Graduate Course of Urban Environmental Sciences, Tokyo Metropolitan University, Minami-ohsawa 1-1, Hachiohji, Tokyo 192-0397 Japan.

<sup>c</sup> Center for Artificial Photosynthesis, Tokyo Metropolitan University, 1-1 Minami-ohsawa, Hachioji, Tokyo 192-0397, Japan.

<sup>d</sup> Department of Chemistry, University of Miami, Coral Gables, Florida 33146-0431 USA.

E-mail: murthy1@miami.edu (VR), takagi-shinsuke@tmu.ac.jp (ST)

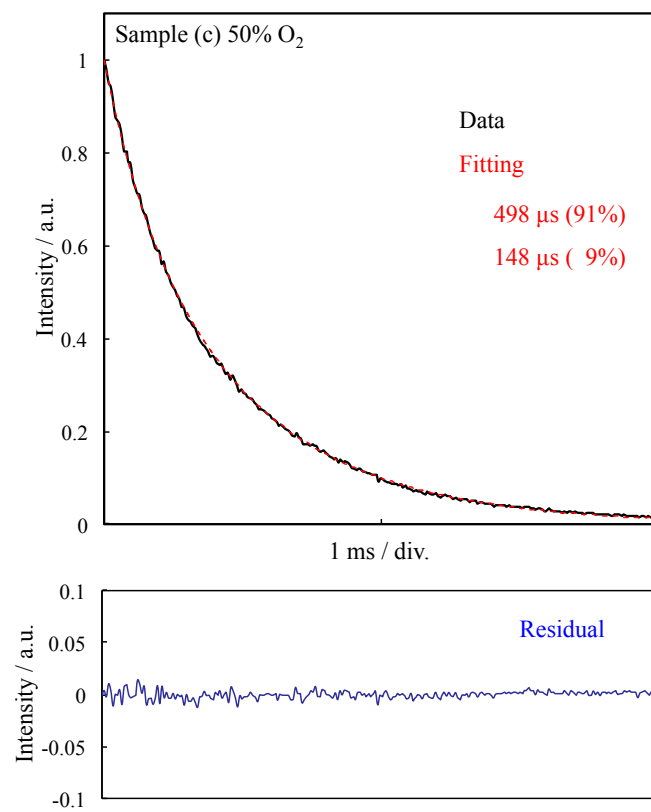

Figure S1. Fitting of lifetime measurement for sample (c) at 50% O<sub>2</sub> concentration.
